# Supplementary material for: Unusually Large Number of Mutations in Asexually Reproducing Clonal Planarian Dugesia japonica
Source: PubMed Central journal article supplement (PMC4654569; doi:10.1371/journal.pone.0143525), 2015-11-20
Supplement: pone.0143525.s006.pdf [file pone.0143525.s006.pdf]

| Quality control                     | Library insert size | Read type         | # of reads     | Total number of reads (bp) | Estimated genome coverage |
|-------------------------------------|---------------------|-------------------|----------------|----------------------------|---------------------------|
| <b>Raw reads</b>                    | 300                 | Forward           | 126,603,871    | 18,990,580,650             |                           |
|                                     |                     | Reverse           | 126,603,871    | 18,990,580,650             |                           |
|                                     | 350                 | Forward           | 88,461,684     | 13,269,252,600             |                           |
|                                     |                     | Reverse           | 88,461,684     | 13,269,252,600             |                           |
|                                     | 400                 | Forward           | 82,558,738     | 12,383,810,700             |                           |
|                                     |                     | Reverse           | 82,558,738     | 12,383,810,700             |                           |
| Total                               |                     | 595,248,586       | 89,287,287,900 | 99 ×                       |                           |
| <b>Quality-value based trimming</b> | 300                 | Forward           | 124,661,428    | 17,291,041,760             |                           |
|                                     |                     | Reverse           | 124,661,428    | 14,478,229,955             |                           |
|                                     | 350                 | Forward           | 87,011,210     | 11,959,962,617             |                           |
|                                     |                     | Reverse           | 87,011,210     | 9,876,951,659              |                           |
|                                     | 400                 | Forward           | 81,260,121     | 11,461,463,022             |                           |
|                                     |                     | Reverse           | 81,260,121     | 9,253,940,172              |                           |
| Total                               |                     | 585,865,518       | 74,321,589,185 | 83 ×                       |                           |
| <b>Overlapping and merging</b>      | 300                 | Merged            | 111,634,593    | 19,570,236,503             |                           |
|                                     |                     | Forward orphan    | 14,677,997     | 2,201,699,550              |                           |
|                                     |                     | Reverse orphan    | 14,677,997     | 2,201,699,550              |                           |
|                                     | 350                 | Merged            | 71,103,678     | 14,545,577,717             |                           |
|                                     |                     | Forward orphan    | 17,154,993     | 2,573,248,950              |                           |
|                                     |                     | Reverse orphan    | 17,154,993     | 2,573,248,950              |                           |
|                                     | 400                 | Merged            | 43,723,953     | 10,702,734,213             |                           |
|                                     |                     | Forward orphan    | 38,797,894     | 5,819,684,100              |                           |
|                                     |                     | Reverse orphan    | 38,797,894     | 5,819,684,100              |                           |
|                                     | Total               |                   | 367,723,992    | 66,007,813,633             |                           |
| <b>Error correction</b>             | 300                 | Corrected forward | 120,995,614    | 16,779,166,011             |                           |
|                                     |                     | Corrected reverse | 120,995,614    | 14,067,060,179             |                           |
|                                     |                     | Orphan            | 3,229,535      | 354,445,348                |                           |
|                                     | 350                 | Corrected forward | 84,082,649     | 11,578,063,331             |                           |
|                                     |                     | Corrected reverse | 84,082,649     | 9,588,429,873              |                           |
|                                     |                     | Orphan            | 2,580,352      | 284,044,918                |                           |
|                                     | 400                 | Corrected forward | 78,872,623     | 11,112,113,980             |                           |
|                                     |                     | Corrected reverse | 78,872,623     | 8,996,649,065              |                           |
|                                     |                     | Orphan            | 2,188,531      | 250,279,452                |                           |
|                                     | Total               |                   | 575,900,190    | 73,010,252,157             |                           |
