# Supplementary material for: Unusually Large Number of Mutations in Asexually Reproducing Clonal Planarian Dugesia japonica
Source: PubMed Central journal article supplement (PMC4654569; doi:10.1371/journal.pone.0143525), 2015-11-20
Supplement: pone.0143525.s007.pdf [file pone.0143525.s007.pdf]

| <b>Quality control</b>       | <b>Assembler</b> | <b>Parameter</b> | <b>Contig N50 (bp)</b> | <b>Total contig length (bp)</b> | <b>Scaffold N50 (bp)</b> | <b>Total scaffold length (bp)</b> |
|------------------------------|------------------|------------------|------------------------|---------------------------------|--------------------------|-----------------------------------|
| Quality-value based trimming | SOAPdenovo       | k-mer=61         | 178                    | 2,707,596,023                   | 220                      | 2,827,016,379                     |
| Overlapping and merging      | SOAPdenovo       | k-mer=83         | 222                    | 3,677,151,163                   | 226                      | 3,684,100,940                     |
| Error correction             | SOAPdenovo       | k-mer=83         | 233                    | 289,672,692                     | 273                      | 294,563,714                       |
|                              | Platanus         | u=0.3            | 114                    | 4,419,099,506                   | 290                      | 954,639,547                       |

\* For each assembly, only contigs/scaffolds  $\geq 100$  bp in length are shown
