# Supplementary material for: Unusually Large Number of Mutations in Asexually Reproducing Clonal Planarian Dugesia japonica
Source: PubMed Central journal article supplement (PMC4654569; doi:10.1371/journal.pone.0143525), 2015-11-20
Supplement: pone.0143525.s008.pdf [file pone.0143525.s008.pdf]

| Isogroup      | Length (bp) | Read count of AB | Read count of PB | Normalized fold change (log <sub>2</sub> ) | P-value     | SWISS-PROT annotation                                                                                   | E-value   | TrEMBL annotation                                                                                                                    | E-value   | NCBI NR annotation                                                                                                                                                                                                                                                                                                                                                                                                                                                                             | E-value   |
|---------------|-------------|------------------|------------------|--------------------------------------------|-------------|---------------------------------------------------------------------------------------------------------|-----------|--------------------------------------------------------------------------------------------------------------------------------------|-----------|------------------------------------------------------------------------------------------------------------------------------------------------------------------------------------------------------------------------------------------------------------------------------------------------------------------------------------------------------------------------------------------------------------------------------------------------------------------------------------------------|-----------|
| isogroup06094 | 1631        | 212              | 12               | 3.86                                       | 0           | Sodium-dependent phosphate transporter 1 OS=Xenopus tropicalis GN=slc20a1 PE=2                          | 8.00E-68  | Uncharacterized protein OS=Lottia gigantea GN=LOTGIDRAFT_239412 PE=4 SV=1                                                            | 1.00E-159 | hypothetical protein LOTGIDRAFT_239412 [Lottia gigantea]                                                                                                                                                                                                                                                                                                                                                                                                                                       | 1.00E-159 |
| isogroup13102 | 1454        | 240              | 19               | 3.38                                       | 0           | Fibroblast growth factor receptor-like 1 OS=Homo sapiens GN=FGFRL1 PE=1 SV=1                            | 8.00E-09  | NDK-6 OS=Dendrocoelum lacteum PE=2 SV=1                                                                                              | 1.00E-121 | Smed-NDK-3 [Schmidtea mediterranea]                                                                                                                                                                                                                                                                                                                                                                                                                                                            | 6.00E-28  |
| isogroup19006 | 874         | 256              | 32               | 2.72                                       | 0           | Transferrin receptor protein 1 (Fragment) OS=Rattus norvegicus GN=Tfrc PE=2 SV=1                        | 0.63      | Cell wall integrity and stress response component 1 OS=Schistosoma japonicum PE=2 SV=1                                               | 1.00E-43  | Cell wall integrity and stress response component 1 precursor [Schistosoma japonicum] emb[CAX77492.1] Cell wall integrity and stress response component 1 precursor [Schistosoma japonicum]                                                                                                                                                                                                                                                                                                    | 9.00E-44  |
| isogroup09800 | 2633        | 995              | 136              | 2.59                                       | 0           | Fibroblast growth factor receptor-like 1 OS=Homo sapiens GN=FGFRL1 PE=1 SV=1                            | 2.00E-04  | Nou darake like-5 OS=Schmidtea mediterranea PE=2 SV=1                                                                                | 0         | nou darake like-5 [Schmidtea mediterranea]                                                                                                                                                                                                                                                                                                                                                                                                                                                     | 0         |
| isogroup05269 | 1804        | 844              | 125              | 2.47                                       | 0           | Sodium- and chloride-dependent glycine transporter 2 OS=Rattus norvegicus                               | 1.00E-176 | Transporter (Fragment) OS=Lottia gigantea GN=LOTGIDRAFT_104703 PE=3 SV=1                                                             | 0         | hypothetical protein LOTGIDRAFT_104703 partial [Lottia gigantea]                                                                                                                                                                                                                                                                                                                                                                                                                               | 0         |
| isogroup10589 | 2094        | 228              | 34               | 2.46                                       | 0           | Fibroblast growth factor receptor-like 1 OS=Gallus gallus GN=FGFRL1 PE=1 SV=1                           | 2.00E-19  | Smed-NDK-4 (Fragment) OS=Schmidtea mediterranea PE=2 SV=1                                                                            | 0         | Smed-NDK-4 [Schmidtea mediterranea]                                                                                                                                                                                                                                                                                                                                                                                                                                                            | 0         |
| isogroup21204 | 742         | 117              | 20               | 2.26                                       | 2.30E-14    | Protein lozenge OS=Drosophila melanogaster GN=lz PE=2 SV=2                                              | 1.00E-28  | Runt-1 OS=Schmidtea mediterranea PE=2 SV=1                                                                                           | 1.00E-107 | runt-like 1 protein [Schmidtea mediterranea] gb[AFJ24721.1] runt-1 [Schmidtea mediterranea]                                                                                                                                                                                                                                                                                                                                                                                                    | 1.00E-107 |
| contig14746   | 1270        | 1231             | 216              | 2.23                                       | 0           | Cholesterol 24-hydroxylase OS=Mus musculus GN=Cyp46a1 PE=2 SV=1                                         | 1.00E-42  | Predicted protein OS=Nematostella vectensis GN=v1g236002 PE=3 SV=1                                                                   | 5.00E-56  | PREDICTED: cholesterol 24-hydroxylase-like [Columba livia]                                                                                                                                                                                                                                                                                                                                                                                                                                     | 5.00E-59  |
| isogroup14819 | 1223        | 89               | 16               | 2.19                                       | 6.80E-11    | Putative zinc finger protein 840 OS=Homo sapiens GN=ZNF840 PE=5 SV=5                                    | 1.00E-06  | Zinc finger protein 40 OS=Echinococcus granulosus GN=EgrG_000673000 PE=4 SV=1                                                        | 9.00E-54  | zinc finger protein 40 [Echinococcus granulosus]                                                                                                                                                                                                                                                                                                                                                                                                                                               | 6.00E-54  |
| isogroup09721 | 2698        | 150              | 27               | 2.19                                       | 0           | Sodium-dependent noradrenaline transporter OS=Mus musculus GN=Slc6a2 PE=2 SV=2                          | 4.00E-37  | Transporter OS=Crassostrea gigas GN=CGI_10022090 PE=3 SV=1                                                                           | 3.00E-39  | Sodium- and chloride-dependent glycine transporter 2 [Crassostrea gigas]                                                                                                                                                                                                                                                                                                                                                                                                                       | 2.00E-39  |
| isogroup26183 | 111         | 153              | 30               | 2.07                                       | 1.11E-16    | Uncharacterized protein ZK112.3 OS=Caenorhabditis elegans GN=ZK112.3 PE=4 SV=1                          | 0.04      | Putative proline-rich protein 21 (Fragment) OS=Hydra vulgaris GN=PRR21 PE=2 SV=1                                                     | 9.00E-06  | hypothetical protein [Spirulina subsalsa]                                                                                                                                                                                                                                                                                                                                                                                                                                                      | 1.00E-04  |
| isogroup19349 | 845         | 55               | 11               | 2.04                                       | 9.64E-07    | Baculoviral IAP repeat-containing protein 7-A OS=Xenopus laevis GN=birc7-a PE=1 SV=1                    | 1.00E-07  | Uncharacterized protein OS=Capitella teleta GN=CAPTEDRAFT_120337 PE=4 SV=1                                                           | 8.00E-08  | PREDICTED: baculoviral IAP repeat-containing protein 4-like [Saccoglossus kowalevskii]                                                                                                                                                                                                                                                                                                                                                                                                         | 2.00E-08  |
| isogroup21510 | 723         | 47               | 10               | 1.95                                       | 1.09E-05    | Protein ZBED8 OS=Bos taurus GN=ZBED8 PE=2 SV=1                                                          | 9.00E-15  | Chromosome undetermined SCAF7481, whole genome shotgun sequence. (Fragment) OS=Tetraodon nigroviridis GN=GSTENG00004516001 PE=4 SV=1 | 9.00E-18  | unnamed protein product [Tetraodon nigroviridis]                                                                                                                                                                                                                                                                                                                                                                                                                                               | 6.00E-18  |
| isogroup09861 | 2579        | 335              | 75               | 1.88                                       | 0           | Fibroblast growth factor receptor-like 1 OS=Mus musculus GN=Fgfr1 PE=1 SV=1                             | 2.00E-18  | NOU-DARAKE OS=Dugesia japonica GN=nou-darake PE=2 SV=1                                                                               | 0         | NOU-DARAKE [Dugesia japonica]                                                                                                                                                                                                                                                                                                                                                                                                                                                                  | 0         |
| isogroup13916 | 1323        | 56               | 13               | 1.82                                       | 4.41E-06    | Zinc finger protein ZIC 1 OS=Gallus gallus GN=ZIC1 PE=1 SV=1                                            | 1.00E-91  | Zinc finger protein Dj-ZicA OS=Dugesia japonica GN=Dj-ZicA PE=2 SV=1                                                                 | 0         | zinc finger protein Dj-ZicA [Dugesia japonica]                                                                                                                                                                                                                                                                                                                                                                                                                                                 | 0         |
| isogroup25913 | 200         | 72               | 17               | 1.80                                       | 2.49E-07    | Synaptic vesicle glycoprotein 2B OS=Mus musculus GN=SV2b PE=1 SV=1                                      | 7.2       | Predicted protein (Fragment) OS=Nematostella vectensis GN=v1g74567 PE=4 SV=1                                                         | 4.00E-13  | predicted protein [Nematostella vectensis] gb[EDO36545.1] predicted protein [Nematostella vectensis]                                                                                                                                                                                                                                                                                                                                                                                           | 3.00E-13  |
| isogroup04716 | 9110        | 1775             | 424              | 1.78                                       | 0           | Translation initiation factor IF-2 OS=Persephonella marina (strain DSM 14350 / EX-H1) GN=infB PE=3 SV=1 | 0.089     | Predicted protein OS=Physcomitrella patens subsp. patens GN=PHYPADRAFT_66556 PE=4 SV=1                                               | 8.00E-10  | predicted protein [Physcomitrella patens subsp. patens] gb[EDQ81290.1] predicted protein [Physcomitrella patens subsp. patens] PREDICTED: uncharacterized protein LOC101886116 isoform X1 [Danio rerio] ref[XP_005172039.1] PREDICTED: uncharacterized protein LOC101886116 isoform X2 [Danio rerio] ref[XP_005172040.1] PREDICTED: uncharacterized protein LOC101886116 isoform X3 [Danio rerio] ref[XP_005172041.1] PREDICTED: uncharacterized protein LOC101886116 isoform X4 [Danio rerio] | 6.00E-10  |
| contig16471   | 943         | 50               | 12               | 1.77                                       | 2.05E-05    | Retrovirus-related Pol polyprotein from transposon 297 OS=Drosophila melanogaster GN=pol PE=4 SV=1      | 7.00E-24  | Retrovirus polyprotein OS=Dicentrarchus labrax GN=DLA_I03860 PE=4 SV=1                                                               | 1.00E-24  | uncharacterized protein LOC101886116 isoform X2 [Danio rerio] ref[XP_005172040.1] PREDICTED: uncharacterized protein LOC101886116 isoform X3 [Danio rerio] ref[XP_005172041.1] PREDICTED: uncharacterized protein LOC101886116 isoform X4 [Danio rerio]                                                                                                                                                                                                                                        | 7.00E-26  |
| isogroup24538 | 490         | 173              | 42               | 1.76                                       | 3.44E-15    | Apolipoporphins OS=Drosophila melanogaster GN=Rfabg PE=1 SV=2                                           | 5.00E-14  | Uncharacterized protein OS=Tupaia chinensis GN=TREES_T100018447 PE=4 SV=1                                                            | 1.00E-21  | PREDICTED: vitellogenin-like, partial [Pongc abelii]                                                                                                                                                                                                                                                                                                                                                                                                                                           | 2.00E-22  |
| isogroup05528 | 1764        | 41               | 10               | 1.75                                       | 0.000132148 | Probable DNA polymerase OS=Podospora anserina PE=3 SV=1                                                 | 0.073     | Protein CBG15088 OS=Caenorhabditis briggsae GN=CBG15088 PE=4 SV=2                                                                    | 2.00E-25  | Protein CBG25579 [Caenorhabditis briggsae]                                                                                                                                                                                                                                                                                                                                                                                                                                                     | 3.00E-32  |
| isogroup03889 | 443         | 73               | 18               | 1.74                                       | 4.01E-07    | PR domain zinc finger protein 12 OS=Mus musculus GN=Prdm12 PE=3 SV=1                                    | 2.00E-06  | Predicted protein (Fragment) OS=Nematostella vectensis GN=v1g119550 PE=4 SV=1                                                        | 1.00E-07  | predicted protein [Nematostella vectensis] gb[EDO36495.1] predicted protein [Nematostella vectensis]                                                                                                                                                                                                                                                                                                                                                                                           | 7.00E-08  |
| contig13483   | 934         | 259              | 65               | 1.71                                       | 0           | Zinc finger protein 737 OS=Homo sapiens GN=ZNF737 PE=2 SV=3                                             | 0.22      | Collagen alpha 1(VII) chain OS=Echinococcus multilocularis GN=EmuJ_000619300 PE=4                                                    | 4.00E-10  | collagen alpha 1(VII) chain [Echinococcus granulosus]                                                                                                                                                                                                                                                                                                                                                                                                                                          | 2.00E-09  |
| isogroup06194 | 1447        | 222              | 57               | 1.68                                       | 0           | Protein Wnt-2b-A OS=Xenopus laevis GN=wnt2b-a PE=2 SV=1                                                 | 7.00E-96  | Protein Wnt (Fragment) OS=Dugesia japonica GN=DjwntB PE=2 SV=1                                                                       | 0         | WNT [Dugesia japonica]                                                                                                                                                                                                                                                                                                                                                                                                                                                                         | 0         |
| isogroup05208 | 2136        | 151              | 40               | 1.63                                       | 2.92E-12    | Frizzled-8 OS=Xenopus laevis GN=fzd8 PE=1 SV=1                                                          | 1.00E-109 | Frizzled receptor OS=Dugesia japonica GN=DjFzA PE=2 SV=1                                                                             | 0         | frizzled receptor [Dugesia japonica]                                                                                                                                                                                                                                                                                                                                                                                                                                                           | 0         |

|               |       |       |       |      |             |                                                                                                                                                              |          |                                                                                                                                              |           |                                                                                                                                                                                                                                                                    |           |
|---------------|-------|-------|-------|------|-------------|--------------------------------------------------------------------------------------------------------------------------------------------------------------|----------|----------------------------------------------------------------------------------------------------------------------------------------------|-----------|--------------------------------------------------------------------------------------------------------------------------------------------------------------------------------------------------------------------------------------------------------------------|-----------|
| isogroup17454 | 981   | 108   | 29    | 1.61 | 4.81E-09    | Secreted frizzled-related protein 2 OS=Mus musculus GN=Sfrp2 PE=2 SV=2                                                                                       | 4.00E-45 | Secreted frizzled-related protein A (Fragment) OS=Dugesia japonica GN=DisFRP-A PE=2                                                          | 0         | secreted frizzled-related protein A [Dugesia japonica]                                                                                                                                                                                                             | 0         |
| isogroup09578 | 2854  | 1008  | 271   | 1.61 | 0           | Uncharacterized protein ORF91 OS=Phalaenopsis aphrodite subsp. formosana PE=4 SV=1                                                                           | 8.00E-14 | Putative uncharacterized protein OS=Clostridium carboxidivorans P7 GN=CLCAR_4307 PE=4 SV=1                                                   | 8.00E-62  | hypothetical protein [Clostridium carboxidivorans] gb EFG86088.1  hypothetical protein CLCAR_4307 [Clostridium carboxidivorans P7]                                                                                                                                 | 6.00E-62  |
| isogroup19020 | 870   | 37    | 10    | 1.60 | 0.000644894 | Ras-related protein Rap-1 OS=Caenorhabditis elegans GN=rap-1 PE=3 SV=1                                                                                       | 2.00E-25 | Uncharacterized protein OS=Lottia gigantea GN=LOTGIDRAFT_229516 PE=4 SV=1                                                                    | 1.00E-31  | hypothetical protein LOTGIDRAFT_229516 [Lottia gigantea]                                                                                                                                                                                                           | 9.00E-32  |
| isogroup00813 | 14144 | 60001 | 16218 | 1.60 | 0           | Replicase polyprotein OS=Cricket paralysis virus (isolate Telegoryllus commodus/Australia/CrPVVIC/1968) GN=ORF1 PE=1 SV=1                                    | 2.00E-45 | Non-structural polyprotein OS=Formica exsecta virus 1 GN=FEX1gp1 PE=4 SV=1                                                                   | 3.00E-49  | nonstructural polyprotein [Solenopsis invicta virus-1] gb AAU85375.1  nonstructural polyprotein [Solenopsis invicta virus-1]                                                                                                                                       | 2.00E-46  |
| contig20555   | 3806  | 6709  | 1817  | 1.60 | 0           | Apolipoporphins OS=Locusta migratoria PE=1 SV=2                                                                                                              | 2.00E-35 | Uncharacterized protein OS=Crassostrea gigas GN=CGI_10002658 PE=4 SV=1                                                                       | 1.00E-84  | hypothetical protein CGI_10002658 [Crassostrea gigas]                                                                                                                                                                                                              | 7.00E-85  |
| contig13535   | 611   | 55    | 15    | 1.59 | 3.54E-05    | Zonadhesin OS=Mus musculus GN=Zan PE=2 SV=1                                                                                                                  | 8.00E-12 | Putative von Willebrand factor type A domain-containing protein OS=Schistosoma mansoni GN=Smp_157690 PE=4 SV=1                               | 5.00E-18  | putative von Willebrand factor type A domain-containing protein [Schistosoma mansoni]                                                                                                                                                                              | 3.00E-18  |
| isogroup13604 | 1377  | 66    | 18    | 1.59 | 5.89E-06    | Forkhead box protein J1.2 OS=Xenopus laevis GN=foxj1.2 PE=2 SV=1                                                                                             | 1.00E-34 | Forkhead box J1-like protein 1 OS=Schmidtea mediterranea PE=2 SV=1                                                                           | 1.00E-169 | forkhead box J1-like protein 1 [Schmidtea mediterranea]                                                                                                                                                                                                            | 1.00E-169 |
| isogroup23274 | 607   | 2439  | 666   | 1.59 | 0           | Protein E7 OS=Human papillomavirus type 55 GN=E7 PE=3 SV=1                                                                                                   | 0.59     | Uncharacterized protein (Fragment) OS=Schmidtea mediterranea PE=2 SV=1                                                                       | 8.00E-23  | hypothetical protein, partial [Schmidtea mediterranea]                                                                                                                                                                                                             | 5.00E-23  |
| contig20552   | 1786  | 1575  | 435   | 1.57 | 0           | Protein ycf2 OS=Marchantia polymorpha GN=yfc2 PE=3 SV=1                                                                                                      | 2.00E-05 | Uncharacterized protein OS=Fusobacterium periodonticum ATCC 33693 GN=FUSPEROL_02206 PE=4 SV=1                                                | 9.00E-07  | hypothetical protein [Fusobacterium periodonticum] gb EFE85848.1  hypothetical protein FUSPEROL_02206 [Fusobacterium periodonticum ATCC 33693]                                                                                                                     | 6.00E-07  |
| isogroup07395 | 946   | 36    | 10    | 1.56 | 0.000947792 | Cellular nucleic acid-binding protein homolog OS=Schizosaccharomyces pombe (strain 972 / ATCC 24843) GN=byr3 PE=4 SV=1                                       | 2.00E-11 | Singapore isolate B (sub-type 7) whole genome shotgun sequence assembly, scaffold_21 OS=Blastocystis hominis GN=GSBLH_T00002894001 PE=4 SV=1 | 1.00E-11  | PREDICTED: CCHC-type zinc finger protein CG3800-like isoform 1 [Bombus terrestris] ref XP_003397960.1  PREDICTED: CCHC-type zinc finger protein CG3800-like isoform 2 [Bombus terrestris] ref XP_003485390.1  PREDICTED: CCHC-type zinc finger protein CG3800-like | 1.00E-12  |
| contig20548   | 1479  | 6341  | 1811  | 1.52 | 0           | Apolipoporphins OS=Locusta migratoria PE=1 SV=2                                                                                                              | 2.00E-13 | Apolipoporphin OS=Ascaris suum GN=ASU_02895 PE=4 SV=1                                                                                        | 6.00E-27  | PREDICTED: zonadhesin-like [Saccoglossus kowalevskii]                                                                                                                                                                                                              | 4.00E-30  |
| isogroup16347 | 1073  | 49    | 14    | 1.52 | 0.000154728 | Unconventional myosin-Va OS=Mus musculus GN=Myo5a PE=1 SV=2                                                                                                  | 2.00E-07 | NAD-dependent DNA ligase OS=Pleurocapsa sp. PCC 7327 GN=Plc7327_4433 PE=4 SV=1                                                               | 1.00E-07  | NAD-dependent DNA ligase [Pleurocapsa sp. PCC 7327] ref WP_015145834.1  NAD-dependent DNA ligase [Pleurocapsa minor] gb AFY79538.1  NAD-dependent DNA                                                                                                              | 8.00E-08  |
| isogroup21173 | 744   | 542   | 155   | 1.52 | 0           | Elongation factor 4 OS=Leptospira borgpetersenii serovar Hardjo-bovis (strain L550) GN=lepA PE=3 SV=1                                                        | 0.011    | SJCHGC05825 protein (Fragment) OS=Schistosoma japonicum PE=2 SV=2                                                                            | 7.00E-37  | SJCHGC05825 protein [Schistosoma japonicum]                                                                                                                                                                                                                        | 5.00E-37  |
| isogroup14546 | 1254  | 150   | 43    | 1.52 | 4.00E-11    | Silk gland factor 1 OS=Bombyx mori GN=SGF1 PE=2 SV=1                                                                                                         | 1.00E-68 | Winged helix/forkhead transcription factor DIFoxA OS=Dugesia japonica GN=DIFoxA                                                              | 0         | winged helix/forkhead transcription factor DIFoxA [Dugesia japonica]                                                                                                                                                                                               | 0         |
| isogroup10556 | 2109  | 225   | 65    | 1.51 | 8.88E-16    | Zinc finger protein ZIC 2 OS=Homo sapiens GN=ZIC2 PE=1 SV=2                                                                                                  | 7.00E-84 | Zinc finger protein Dj-ZicB OS=Dugesia japonica GN=Dj-ZicB PE=2 SV=1                                                                         | 0         | zinc finger protein Dj-ZicB [Dugesia japonica]                                                                                                                                                                                                                     | 0         |
| isogroup23806 | 564   | 38    | 11    | 1.50 | 0.000961778 | Dynein heavy chain (Fragment) OS=Oncorhynchus mykiss PE=2 SV=1                                                                                               | 0.01     | Uncharacterized protein OS=Helobdella robusta GN=HELRODRAFT_176662 PE=4 SV=1                                                                 | 4.00E-10  | hypothetical protein HELRODRAFT_176662 [Helobdella robusta]                                                                                                                                                                                                        | 2.00E-10  |
| contig13534   | 690   | 55    | 16    | 1.50 | 7.56E-05    | Kielin/chordin-like protein OS=Mus musculus GN=Kcp PE=1 SV=2                                                                                                 | 8.00E-10 | IgGFC-binding protein OS=Crassostrea gigas GN=CGI_10015609 PE=4 SV=1                                                                         | 2.00E-33  | IgGFC-binding protein [Crassostrea gigas]                                                                                                                                                                                                                          | 1.00E-33  |
| isogroup10908 | 1952  | 41    | 12    | 1.49 | 0.000667435 | Putative ankyrin repeat protein L66 OS=Acanthamoeba polyphaga mimivirus GN=MIMI_L66 PE=4 SV=1                                                                | 0.01     | Location of vulva defective 1 OS=Crassostrea gigas GN=CGI_10007022 PE=4 SV=1                                                                 | 2.00E-24  | Location of vulva defective 1 [Crassostrea gigas]                                                                                                                                                                                                                  | 2.00E-24  |
| isogroup18798 | 885   | 41    | 12    | 1.49 | 0.000667435 | Homeobox protein SIX6 OS=Gallus gallus GN=SIX6 PE=2 SV=1                                                                                                     | 4.00E-86 | Six3-1 (Fragment) OS=Schmidtea mediterranea PE=2 SV=1                                                                                        | 1.00E-123 | six3-1, partial [Schmidtea mediterranea]                                                                                                                                                                                                                           | 1.00E-124 |
| isogroup08547 | 309   | 112   | 33    | 1.48 | 2.18E-08    | Protein PF14_0175 OS=Plasmodium falciparum (isolate 3D7) GN=PF14_0175 PE=4 SV=1                                                                              | 1.1      | Putative uncharacterized protein (Fragment) OS=Camponotus floridanus GN=EAG_03031 PE=4 SV=1                                                  | 2.00E-12  | hypothetical protein EAG_03031 [Camponotus floridanus]                                                                                                                                                                                                             | 2.00E-12  |
| contig13499   | 1171  | 207   | 61    | 1.48 | 2.78E-14    | Probable DNA repair protein RAD50 OS=Plasmodium falciparum (isolate 3D7) GN=PFF0285c PE=3 SV=1                                                               | 3.5      | Putative von Willebrand factor type A domain-containing protein OS=Schistosoma mansoni GN=Smp_157690 PE=4 SV=1                               | 9.00E-06  | putative von Willebrand factor type A domain-containing protein [Schistosoma mansoni]                                                                                                                                                                              | 6.00E-06  |
| isogroup22411 | 673   | 79    | 24    | 1.43 | 4.31E-06    | Uncharacterized protein C1751.04 OS=Schizosaccharomyces pombe (strain 972 / ATCC 24843) GN=SPAC1751.04 PE=4 SV=2                                             | 6.9      | Uncharacterized protein (Fragment) OS=Lottia gigantea GN=LOTGIDRAFT_148500 PE=4                                                              | 2.00E-12  | hypothetical protein LOTGIDRAFT_148500 partial [Lottia gigantea]                                                                                                                                                                                                   | 1.00E-12  |
| isogroup03845 | 1089  | 492   | 150   | 1.43 | 0           | Signal recognition particle receptor FtsY OS=Sulfolobus acidocaldarius (strain ATCC 33909 / DSM 639 / JCM 8929 / NBRC 15157 / NCIMB 11770) GN=ftsY PE=3 SV=1 | 7.2      | Putative uncharacterized protein OS=Daphnia pulex GN=DAPPUDRAFT_317650 PE=4 SV=1                                                             | 6.00E-15  | hypothetical protein DAPPUDRAFT_317650 [Daphnia pulex]                                                                                                                                                                                                             | 5.00E-15  |
| isogroup01942 | 433   | 308   | 94    | 1.43 | 0           | Epsin OS=Dictyostelium discoideum GN=epnA PE=3 SV=1                                                                                                          | 2.5      | Uncharacterized protein (Fragment) OS=Ficedula albicollis PE=4 SV=1                                                                          | 7.00E-09  | PREDICTED: BAT2 domain containing 1-like [Saccoglossus kowalevskii]                                                                                                                                                                                                | 7.00E-09  |
| isogroup14946 | 1208  | 72    | 22    | 1.43 | 1.25E-05    | SH3 domain-binding protein 4-A OS=Xenopus laevis GN=sh3bp4-a PE=2 SV=1                                                                                       | 0.76     | Uncharacterized protein OS=Crassostrea gigas GN=CGI_10008774 PE=4 SV=1                                                                       | 1.00E-15  | PREDICTED: uncharacterized protein LOC101848372 isoform X1 [Aplysia californica] ref XP_005104171.1  PREDICTED: uncharacterized protein LOC101848372 isoform X2 [Aplysia californica]                                                                              | 3.00E-17  |
| isogroup15224 | 1169  | 62    | 19    | 1.42 | 5.23E-05    | Uncharacterized protein C1751.04 OS=Schizosaccharomyces pombe (strain 972 / ATCC 24843) GN=SPAC1751.04 PE=4 SV=2                                             | 6.9      | Uncharacterized protein OS=Acyrthosiphon pisum PE=4 SV=1                                                                                     | 1.00E-21  | conserved hypothetical protein [Trichinella spiralis] gb EFV50790.1  conserved hypothetical protein [Trichinella spiralis]                                                                                                                                         | 1.00E-21  |

|               |      |       |      |      |             |                                                                                                                                                                          |           |                                                                                                                                                  |           |                                                                                                                                                                                                                                                                                                                   |           |
|---------------|------|-------|------|------|-------------|--------------------------------------------------------------------------------------------------------------------------------------------------------------------------|-----------|--------------------------------------------------------------------------------------------------------------------------------------------------|-----------|-------------------------------------------------------------------------------------------------------------------------------------------------------------------------------------------------------------------------------------------------------------------------------------------------------------------|-----------|
| isogroup19067 | 867  | 68    | 21   | 1.41 | 2.54E-05    | Replicase polyprotein 1ab OS=Porcine transmissible gastroenteritis coronavirus (strain Purdue) GN=rep PE=1 SV=1                                                          | 1.7       | Putative uncharacterized protein (Fragment) OS=Acromyrmex echinator GN=G51_03377 PE=4 SV=1                                                       | 3.00E-12  | hypothetical protein G51_03377 [Acromyrmex echinator]                                                                                                                                                                                                                                                             | 2.00E-12  |
| isogroup12727 | 1513 | 48    | 15   | 1.39 | 0.000454846 | Mariner Mos1 transposase OS=Drosophila mauritiana GN=marinerT PE=1 SV=1                                                                                                  | 8.00E-04  | Uncharacterized protein (Fragment) OS=Bos mutus GN=M91_17600 PE=4 SV=1                                                                           | 8.00E-14  | PREDICTED: histone-lysine N-methyltransferase SETMAR-like [Bos taurus] ref XP_005218920.1  PREDICTED: histone-lysine N-methyltransferase SETMAR-                                                                                                                                                                  | 2.00E-15  |
| isogroup22459 | 672  | 48    | 15   | 1.39 | 0.000454846 | cAMP-dependent protein kinase type I-beta regulatory subunit OS=Homo sapiens GN=PRKAR1B PE=1 SV=4                                                                        | 3.00E-10  | Uncharacterized protein OS=Lottia gigantea GN=LOTGIDRAFT_227784 PE=4 SV=1                                                                        | 7.00E-36  | hypothetical protein LOTGIDRAFT_227784 [Lottia gigantea]                                                                                                                                                                                                                                                          | 5.00E-36  |
| isogroup12706 | 1514 | 54    | 17   | 1.38 | 0.000217931 | Zinc finger C2HC domain-containing protein 1A OS=Xenopus laevis GN=zc2hc1a PE=2 SV=1                                                                                     | 3.00E-10  | Uncharacterized protein OS=Amphimedon queenslandica GN=LOC100634074 PE=4 SV=1                                                                    | 3.00E-12  | PREDICTED: hypothetical protein LOC100634074 [Amphimedon queenslandica]                                                                                                                                                                                                                                           | 2.00E-12  |
| isogroup15935 | 1113 | 54    | 17   | 1.38 | 0.000217931 | Protein tailless OS=Drosophila virilis GN=tlf PE=3 SV=1                                                                                                                  | 6.00E-51  | Nuclear receptor TLX-1 OS=Schmidtea mediterranea GN=tlx-1 PE=2 SV=1                                                                              | 1.00E-176 | nuclear receptor TLX-1 [Schmidtea mediterranea]                                                                                                                                                                                                                                                                   | 1.00E-176 |
| contig13523   | 663  | 163   | 52   | 1.36 | 2.07E-10    | Bowman-Birk type trypsin inhibitor OS=Hordeum vulgare GN=BBBI PE=1 SV=1                                                                                                  | 0.54      | Collagen alpha 1VII chain OS=Echinococcus granulosus GN=EqrG_000619300 PE=4 SV=1                                                                 | 2.00E-08  | collagen alpha 1VII chain [Echinococcus granulosus]                                                                                                                                                                                                                                                               | 2.00E-08  |
| isogroup18347 | 880  | 47    | 15   | 1.36 | 0.000644795 | DNA polymerase OS=Acanthamoeba polyphaga mimivirus GN=POLB PE=3 SV=1                                                                                                     | 1.00E-21  | DNA polymerase (Fragment) OS=Megavirus courdo5 PE=3 SV=1                                                                                         | 2.00E-23  | B-family DNA polymerase, partial [Mimivirus Bus] gb AFM52364.1  B-family DNA polymerase, partial [Megavirus courdo5]                                                                                                                                                                                              | 2.00E-23  |
| isogroup25915 | 201  | 175   | 56   | 1.36 | 5.04E-11    | Uncharacterized protein C2orf16 OS=Homo sapiens GN=C2orf16 PE=2 SV=3                                                                                                     | 1.00E-14  | Melatonin-related receptor OS=Pteropus alecto GN=PAL_GLEAN10000992 PE=3 SV=1                                                                     | 2.00E-15  | PREDICTED: uncharacterized protein LOC101885061 [Danio rerio]                                                                                                                                                                                                                                                     | 1.00E-20  |
| isogroup08766 | 610  | 134   | 43   | 1.36 | 9.69E-09    | Cuticle protein 16.5, isoform A OS=Locusta migratoria PE=1 SV=1                                                                                                          | 3.3       | Uncharacterized protein OS=Lottia gigantea GN=LOTGIDRAFT_145636 PE=4 SV=1                                                                        | 4.00E-10  | hypothetical protein LOTGIDRAFT_145636 [Lottia gigantea]                                                                                                                                                                                                                                                          | 2.00E-10  |
| isogroup10846 | 1975 | 124   | 40   | 1.35 | 3.92E-08    | Frizzled-5 OS=Xenopus laevis GN=fzd5 PE=2 SV=1                                                                                                                           | 0         | Fzd-5/8-1 OS=Schmidtea mediterranea PE=2 SV=1                                                                                                    | 0         | PREDICTED: LOW QUALITY PROTEIN: frizzled-5-like [Aplysia californica]                                                                                                                                                                                                                                             | 0         |
| isogroup25830 | 221  | 96    | 31   | 1.35 | 1.36E-06    | Delta(24(24(1)))-sterol reductase OS=Saccharomyces cerevisiae (strain ATCC 204508 / S288c) GN=ERG4 PE=1 SV=2                                                             | 0.017     | Uncharacterized protein (Fragment) OS=Helobdella robusta GN=HELRODRAFT_90243 PE=4 SV=1                                                           | 3.00E-09  | hypothetical protein HELRODRAFT_90243, partial [Helobdella robusta]                                                                                                                                                                                                                                               | 2.00E-09  |
| isogroup12449 | 1559 | 609   | 200  | 1.32 | 0           | Fibroblast growth factor receptor-like 1 OS=Gallus gallus GN=FGFRL1 PE=1 SV=1                                                                                            | 1.00E-11  | Smed-NDK-3 (Fragment) OS=Schmidtea mediterranea PE=2 SV=1                                                                                        | 1.00E-179 | Smed-NDK-3 [Schmidtea mediterranea]                                                                                                                                                                                                                                                                               | 1.00E-180 |
| isogroup13228 | 1432 | 76    | 25   | 1.32 | 2.31E-05    | Procollagen-lysine, 2-oxoglutarate 5-dioxygenase 2 OS=Mus musculus GN=Plod2 PE=2 SV=2                                                                                    | 1.00E-132 | Procollagen-lysine, 2-oxoglutarate 5-dioxygenase 3 OS=Schistosoma japonicum GN=plod-prov PE=2 SV=1                                               | 1.00E-148 | procollagen-lysine, 2-oxoglutarate 5-dioxygenase 3 [Schistosoma japonicum]                                                                                                                                                                                                                                        | 1.00E-149 |
| isogroup13050 | 1462 | 469   | 156  | 1.30 | 0           | Minor capsid protein L2 OS=Human papillomavirus type 45 GN=L2 PE=3 SV=1                                                                                                  | 2.2       | Uncharacterized protein OS=Collinsella aerofaciens ATCC 25986 GN=COLAER_01671 PE=4 SV=1                                                          | 5.00E-36  | hypothetical protein [Collinsella aerofaciens] gb EBA38630.1  hypothetical protein COLAER_02284 [Collinsella aerofaciens ATCC 25986] gb EBA38843.1  hypothetical protein COLAER_01925 [Collinsella aerofaciens ATCC 25986] gb EBA39061.1  hypothetical protein COLAER_01671 [Collinsella aerofaciens ATCC 25986]  | 4.00E-36  |
| isogroup12940 | 1473 | 105   | 35   | 1.30 | 8.67E-07    | Zinc finger protein GIS2 OS=Saccharomyces cerevisiae (strain ATCC 204508 / S288c) GN=GIS2 PE=1 SV=1                                                                      | 4.00E-06  | Piso0_005509 protein OS=Pichia sorbitophila (strain ATCC MYA-4447 / BCRC 22081 / CBS 7064 / NBRC 10061 / NRRL Y-12695) GN=Piso0_005509 PE=4 SV=1 | 1.00E-06  | Piso0_005509 [Milleroyzma farinosa CBS 7064] emb CCE85873.1  Piso0_005509 [Milleroyzma farinosa CBS 7064]                                                                                                                                                                                                         | 9.00E-07  |
| isogroup16323 | 1070 | 48    | 16   | 1.30 | 0.000880055 | Neuronal acetylcholine receptor subunit alpha-10 OS=Gallus gallus GN=CHRNA10 PE=3                                                                                        | 1.00E-91  | Uncharacterized protein (Fragment) OS=Lottia gigantea GN=LOTGIDRAFT_102597 PE=3                                                                  | 1.00E-152 | hypothetical protein LOTGIDRAFT_102597, partial [Lottia gigantea]                                                                                                                                                                                                                                                 | 1.00E-152 |
| isogroup00275 | 6071 | 12952 | 4336 | 1.29 | 0           | SCO-spondin OS=Gallus gallus GN=SSPO PE=2 SV=1                                                                                                                           | 7.00E-18  | Uncharacterized protein (Fragment) OS=Latimeria chalumnae PE=4 SV=1                                                                              | 4.00E-17  | PREDICTED: SCO-spondin-like [Latimeria chalumnae]                                                                                                                                                                                                                                                                 | 3.00E-17  |
| isogroup22285 | 682  | 3349  | 1132 | 1.28 | 0           | Soma ferritin OS=Lymnaea stagnalis PE=2 SV=2                                                                                                                             | 4.00E-71  | Ferritin (Fragment) OS=Branchiostoma lanceolatum PE=2 SV=2                                                                                       | 8.00E-76  | ferritin heavy chain polypeptide 1 [Branchiostoma lanceolatum]                                                                                                                                                                                                                                                    | 6.00E-76  |
| contig12785   | 1400 | 65    | 22   | 1.28 | 0.000133376 | Histone-lysine N-methyltransferase SETMAR OS=Homo sapiens GN=SETMAR PE=1 SV=1                                                                                            | 2.00E-11  | Histone-lysine N-methyltransferase SETMAR (Fragment) OS=Bos mutus GN=M91_04391 PE=4 SV=1                                                         | 3.00E-12  | PREDICTED: histone-lysine N-methyltransferase SETMAR-like [Pantholops hodgsonii]                                                                                                                                                                                                                                  | 3.00E-13  |
| isogroup14901 | 1212 | 96    | 33   | 1.26 | 4.66E-06    | WD repeat-containing protein 86 OS=Homo sapiens GN=WDR86 PE=2 SV=3                                                                                                       | 1.00E-83  | Uncharacterized protein OS=Capitella teleta GN=CAPTEDRAFT_115707 PE=4 SV=1                                                                       | 1.00E-123 | hypothetical protein CAPTEDRAFT_115707 [Capitella teleta]                                                                                                                                                                                                                                                         | 1.00E-124 |
| isogroup04007 | 3129 | 654   | 225  | 1.26 | 0           | Protein ycf2 OS=Physcomitrella patens subsp. patens GN=yfc2 PE=3 SV=1                                                                                                    | 2.00E-06  | Putative phenylalanyl-tRNA synthetase, beta subunit OS=Zinderia insecticola (strain CARI) GN=pheT PE=3 SV=1                                      | 1.00E-08  | putative phenylalanyl-tRNA synthetase subunit beta [Candidatus Zinderia insecticola CARI] ref WP_013315231.1  putative phenylalanyl-tRNA synthetase subunit beta [Candidatus Zinderia insecticola] gb ADM89654.1  putative phenylalanyl-tRNA synthetase, beta subunit [Schistosoma japonicum] SJCHGC08483 protein | 8.00E-09  |
| isogroup08369 | 420  | 58    | 20   | 1.25 | 0.00038578  | Kyphocoliosis peptidase OS=Homo sapiens GN=KY PE=1 SV=2                                                                                                                  | 5.00E-16  | SJCHGC08483 protein (Fragment) OS=Schistosoma japonicum PE=2 SV=2                                                                                | 1.00E-55  | SJCHGC08483 protein [Schistosoma japonicum]                                                                                                                                                                                                                                                                       | 1.00E-55  |
| isogroup18026 | 934  | 55    | 19   | 1.25 | 0.000558565 | Chromosomal replication initiator protein DnaA OS=Bifidobacterium longum subsp. infantis (strain ATCC 15697 / DSM 20088 / JCM 1222 / NCTC 11817 / S12) GN=dnaA PE=3 SV=1 | 8.4       | Putative uncharacterized protein OS=Tribolium castaneum GN=TcasGA2_TC009398 PE=4 SV=1                                                            | 2.00E-33  | hypothetical protein TcasGA2_TC009398 [Tribolium castaneum]                                                                                                                                                                                                                                                       | 1.00E-33  |
| isogroup07545 | 870  | 891   | 310  | 1.24 | 0           | PLAC8-like protein 1 OS=Homo sapiens GN=PLAC8L1 PE=2 SV=1                                                                                                                | 6.00E-16  | Placenta-specific gene 8 protein OS=Schistosoma japonicum PE=4 SV=1                                                                              | 4.00E-26  | Placenta-specific gene 8 protein [Schistosoma japonicum]                                                                                                                                                                                                                                                          | 3.00E-26  |
| contig15998   | 1432 | 60    | 21   | 1.23 | 0.000368143 | Histone-lysine N-methyltransferase SETMAR OS=Homo sapiens GN=SETMAR PE=1 SV=1                                                                                            | 3.00E-32  | Histone-lysine N-methyltransferase OS=Homo sapiens GN=SETMAR PE=2 SV=1                                                                           | 2.00E-30  | mariner transposase [Homo sapiens]                                                                                                                                                                                                                                                                                | 1.00E-31  |
| isogroup01861 | 1233 | 593   | 208  | 1.23 | 0           | Solute carrier family 43 member 3 OS=Homo sapiens GN=SLC43A3 PE=1 SV=2                                                                                                   | 7.00E-11  | Solute carrier family 43 OS=Hymenolepis microstoma GN=HmN_000456700 PE=4 SV=1                                                                    | 3.00E-14  | solute carrier family 43 [Hymenolepis microstoma]                                                                                                                                                                                                                                                                 | 2.00E-14  |

|               |      |     |     |      |             |                                                                                                                                                     |           |                                                                                                                                                      |           |                                                                                                                                                                                                                                                                                      |           |
|---------------|------|-----|-----|------|-------------|-----------------------------------------------------------------------------------------------------------------------------------------------------|-----------|------------------------------------------------------------------------------------------------------------------------------------------------------|-----------|--------------------------------------------------------------------------------------------------------------------------------------------------------------------------------------------------------------------------------------------------------------------------------------|-----------|
| isogroup09937 | 2510 | 88  | 31  | 1.22 | 1.80E-05    | Muscle M-line assembly protein unc-89<br>OS=Caenorhabditis elegans GN=unc-89 PE=1<br>SV=3                                                           | 9.00E-24  | Titin OS=Echinococcus multilocularis<br>GN=EmuJ_000610500 PE=4 SV=1                                                                                  | 2.00E-29  | titin [Clonorchis sinensis]                                                                                                                                                                                                                                                          | 7.00E-28  |
| isogroup13092 | 1450 | 56  | 20  | 1.20 | 0.000732596 | FMRFamide-activated amiloride-sensitive<br>sodium channel OS=Helix aspersa PE=2 SV=1                                                                | 5.00E-09  | FMRFamide activated amiloride sensitive<br>sodium OS=Echinococcus multilocularis<br>GN=EmuJ_000738300 PE=3 SV=1                                      | 5.00E-79  | FMRFamide activated amiloride sensitive<br>sodium [Echinococcus granulosus]                                                                                                                                                                                                          | 2.00E-78  |
| isogroup09448 | 3033 | 308 | 111 | 1.19 | 4.11E-15    | Rho GTPase-activating protein 100F<br>OS=Drosophila melanogaster<br>GN=RhoGAP100F PE=1 SV=2                                                         | 9.00E-76  | Rho GTPase activating protein<br>OS=Echinococcus multilocularis<br>GN=EmuJ_000441500 PE=4 SV=1                                                       | 1.00E-103 | rho GTPase activating protein [Echinococcus<br>granulosus]                                                                                                                                                                                                                           | 1.00E-102 |
| contig00128   | 1203 | 86  | 31  | 1.19 | 3.35E-05    | Hepatocyte nuclear factor 6 OS=Rattus<br>norvegicus GN=Oncut1 PE=1 SV=1                                                                             | 4.00E-44  | Uncharacterized protein (Fragment)<br>OS=Loxodonta africana GN=LOC100676371<br>PE=3 SV=1                                                             | 8.00E-47  | PREDICTED: LOW QUALITY PROTEIN:<br>hepatocyte nuclear factor 6-like [Loxodonta<br>africana]                                                                                                                                                                                          | 6.00E-46  |
| isogroup10011 | 2462 | 465 | 170 | 1.17 | 0           | Fibroblast growth factor receptor-like 1<br>OS=Gallus gallus GN=FGFRL1 PE=1 SV=1                                                                    | 2.00E-14  | NDL-4 OS=Dendrocoelum lacteum PE=2 SV=1                                                                                                              | 9.00E-79  | Smed-NDK-4 [Schmidtea mediterranea]                                                                                                                                                                                                                                                  | 5.00E-77  |
| isogroup14430 | 1265 | 93  | 34  | 1.17 | 2.09E-05    | Uncharacterized MFS-type transporter YhjX<br>OS=Escherichia coli (strain K12) GN=yhjX<br>PE=1 SV=1                                                  | 2.00E-27  | Putative uncharacterized protein<br>OS=Branchiostoma floridae<br>GN=BRFLDRAFT_120194 PE=4 SV=1                                                       | 1.00E-103 | hypothetical protein BRAFLDRAFT_120194<br>[Branchiostoma floridae]<br>hypothetical protein BRAFLDRAFT_120194<br>[Branchiostoma floridae]                                                                                                                                             | 1.00E-103 |
| isogroup06039 | 1411 | 82  | 30  | 1.17 | 6.53E-05    | Becclin-1 OS=Xenopus tropicalis GN=becn1<br>PE=2 SV=1                                                                                               | 2.00E-05  | Predicted protein OS=Naegleria gruber<br>GN=NAEGRDRAFT_79948 PE=4 SV=1                                                                               | 5.00E-06  | PREDICTED: trichohyalin [Ochotona princeps]                                                                                                                                                                                                                                          | 2.00E-06  |
| isogroup09762 | 2669 | 171 | 63  | 1.16 | 1.03E-08    | Histone-lysine N-methyltransferase SETMAR<br>OS=Homo sapiens GN=SETMAR PE=1 SV=1                                                                    | 3.00E-09  | Transposase OS=Forficula auricularia PE=4<br>SV=1                                                                                                    | 3.00E-28  | PREDICTED: histone-lysine N-<br>methyltransferase SETMAR-like [Apis florea]                                                                                                                                                                                                          | 7.00E-31  |
| contig13515   | 1122 | 473 | 175 | 1.15 | 0           | Ribosomal operon-associated A protein<br>OS=Euglena gracilis GN=roaA PE=3 SV=1                                                                      | 2.00E-04  | Collagen alpha-1(VII) chain (Fragment)<br>OS=Clonorchis sinensis GN=CLF_109355<br>PE=4 SV=1                                                          | 3.00E-08  | collagen alpha-1(VII) chain, partial [Clonorchis<br>sinensis]                                                                                                                                                                                                                        | 2.00E-08  |
| isogroup11570 | 1752 | 86  | 32  | 1.14 | 5.80E-05    | Histone-lysine N-methyltransferase SETMAR<br>OS=Homo sapiens GN=SETMAR PE=1 SV=1                                                                    | 8.00E-63  | cDNA FLJ54643, highly similar to Homo<br>sapiens SET domain and mariner transposase<br>fusion gene (SETMAR), mRNA OS=Homo                            | 4.00E-63  | transposase [synthetic construct]                                                                                                                                                                                                                                                    | 2.00E-68  |
| isogroup07377 | 754  | 142 | 53  | 1.14 | 2.59E-07    | Pentatricopeptide repeat-containing protein 2<br>mitochondrial OS=Xenopus laevis GN=ptcd2<br>PE=2 SV=1                                              | 1.8       | Uncharacterized protein (Fragment)<br>OS=Nasonia vitripennis PE=4 SV=1                                                                               | 5.00E-10  | hypothetical protein G5I_03377 [Acromyrmex<br>echinator]                                                                                                                                                                                                                             | 1.00E-04  |
| contig17607   | 1866 | 563 | 212 | 1.13 | 0           | Plasminogen OS=Rattus norvegicus GN=Plg<br>PE=2 SV=2                                                                                                | 3.00E-04  | Uncharacterized protein OS=Helobdella robusta<br>GN=HELRODRAFT_166364 PE=4 SV=1                                                                      | 1.00E-06  | hypothetical protein HELRODRAFT_166364<br>[Helobdella robusta]                                                                                                                                                                                                                       | 1.00E-06  |
| isogroup17647 | 966  | 111 | 42  | 1.12 | 7.10E-06    | Gag polyprotein OS=Jembrana disease virus<br>GN=gag PE=3 SV=1                                                                                       | 4.00E-07  | Similar to Cellular nucleic acid-binding protein<br>homolog acc. no. P36627 OS=Pyronema<br>omphalodes (strain CBS 100304)<br>GN=PCON_07655 PE=4 SV=1 | 3.00E-07  | Similar to Cellular nucleic acid-binding protein<br>homolog; acc. no. P36627 [Pyronema<br>omphalodes CBS 100304]                                                                                                                                                                     | 2.00E-07  |
| isogroup02063 | 1160 | 155 | 59  | 1.11 | 1.34E-07    | Importin subunit alpha-3 OS=Caenorhabditis<br>elegans GN=ima-3 PE=1 SV=2                                                                            | 6.00E-09  | Karyopherin alpha 4 (Fragment)<br>OS=Ichthyophis bannanicus PE=2 SV=1                                                                                | 5.00E-09  | karyopherin alpha 4 [Ichthyophis bannanicus]                                                                                                                                                                                                                                         | 3.00E-09  |
| isogroup16938 | 1019 | 76  | 29  | 1.11 | 0.000230042 | Aminomethyltransferase OS=Bacillus<br>licheniformis (strain DSM 13 / ATCC 14580)<br>GN=qcvT PE=3 SV=1                                               | 0.51      | Uncharacterized protein OS=Lottia gigantea<br>GN=LOTGIDRAFT_155939 PE=4 SV=1                                                                         | 2.00E-12  | hypothetical protein LOTGIDRAFT_155939<br>[Lottia gigantea]                                                                                                                                                                                                                          | 1.00E-12  |
| isogroup17540 | 976  | 76  | 29  | 1.11 | 0.000230042 | ADP,ATP carrier protein 3 OS=Saccharomyces<br>cerevisiae (strain ATCC 204508 / S288c)<br>GN=AAC3 PE=1 SV=1                                          | 1.00E-122 | Uncharacterized protein OS=Capitella teleta<br>GN=CAPTEDRAFT_163594 PE=3 SV=1                                                                        | 1.00E-162 | hypothetical protein CAPTEDRAFT_163594<br>[Capitella teleta]                                                                                                                                                                                                                         | 1.00E-162 |
| isogroup10042 | 2445 | 466 | 178 | 1.10 | 0           | Frizzled-5 OS=Xenopus laevis GN=fzd5 PE=2<br>SV=1                                                                                                   | 0         | Fzd-5/8-4 OS=Schmidtea mediterranea PE=2<br>SV=1                                                                                                     | 0         | hypothetical protein LOTGIDRAFT_200873<br>partial [Lottia gigantea]                                                                                                                                                                                                                  | 0         |
| isogroup25838 | 218  | 94  | 36  | 1.10 | 4.49E-05    | Putative uncharacterized protein<br>DDB_G0291608 OS=Dictyostelium discoideum<br>GN=DDB_G0291608 PE=4 SV=1                                           | 0.005     | Mucin OS=Schistosoma mansoni PE=2 SV=1                                                                                                               | 3.00E-07  | mucin [Schistosoma mansoni]                                                                                                                                                                                                                                                          | 2.00E-07  |
| isogroup16007 | 1104 | 104 | 40  | 1.09 | 1.93E-05    | Cellular nucleic acid-binding protein homolog<br>OS=Schizosaccharomyces pombe (strain 972 /<br>ATCC 24843) GN=byr3 PE=4 SV=1                        | 2.00E-11  | Uncharacterized protein (Fragment) OS=Bos<br>taurus GN=ZCCHC13 PE=4 SV=1                                                                             | 1.00E-11  | PREDICTED: CCHC-type zinc finger protein<br>CG3800-like isoform 1 [Bombus<br>terrestris] ref XP_003397960.1  PREDICTED:<br>CCHC-type zinc finger protein CG3800-like<br>isoform 2 [Bombus<br>terrestris] ref XP_003485390.1  PREDICTED:<br>CCHC-type zinc finger protein CG3800-like | 2.00E-12  |
| isogroup06833 | 1435 | 96  | 37  | 1.09 | 4.20E-05    | Putative ankyrin repeat protein L25<br>OS=Acanthamoeba polyphaga mimivirus<br>GN=MIML_L25 PE=4 SV=1                                                 | 5.00E-17  | AAEL014742-PA (Fragment) OS=Aedes aegypti<br>GN=AAEL014742 PE=4 SV=1                                                                                 | 1.00E-36  | ankyrin 2.3/unc44 [Aedes<br>aegypti] gbl EAT33004.1  AAEL014742-PA,<br>partial [Aedes aegypti]                                                                                                                                                                                       | 1.00E-36  |
| isogroup01785 | 2385 | 88  | 34  | 1.09 | 9.16E-05    | Pre-mRNA-splicing factor CWC22<br>OS=Debaryomyces hansenii (strain ATCC<br>36239 / CBS 767 / JCM 1990 / NBRC 0083 /<br>IGC 2968) GN=CWC22 PE=3 SV=2 | 0.16      | Transposase (Fragment) OS=Stylochus zebra<br>PE=4 SV=1                                                                                               | 2.00E-11  | PREDICTED: uncharacterized protein<br>LOC100899128 [Metaseiulus occidentalis]                                                                                                                                                                                                        | 1.00E-15  |
| isogroup25306 | 331  | 88  | 34  | 1.09 | 9.16E-05    | Soluble scavenger receptor cysteine-rich<br>domain-containing protein SSC5D OS=Homo<br>sapiens GN=SSC5D PE=2 SV=3                                   | 8.00E-09  | WGS project CAEQ00000000 data, annotated<br>contig 2455 OS=Trypanosoma congolense<br>(strain IL3000) GN=TCIL3000_0_61090 PE=4                        | 6.00E-35  | unnamed protein product [Trypanosoma<br>congolense IL3000]                                                                                                                                                                                                                           | 4.00E-35  |
| contig13471   | 1840 | 581 | 227 | 1.07 | 0           | Ribosomal operon-associated A protein<br>OS=Euglena gracilis GN=roaA PE=3 SV=1                                                                      | 0.012     | Collagen alpha-1(VII) chain (Fragment)<br>OS=Clonorchis sinensis GN=CLF_109355<br>PE=4 SV=1                                                          | 2.00E-12  | collagen alpha-1(VII) chain, partial [Clonorchis<br>sinensis]                                                                                                                                                                                                                        | 1.00E-12  |
| isogroup09295 | 3279 | 110 | 43  | 1.07 | 1.57E-05    | ATP-binding cassette sub-family A member 1<br>OS=Mus musculus GN=Abca1 PE=1 SV=4                                                                    | 1.00E-178 | Uncharacterized protein OS=Lottia gigantea<br>GN=LOTGIDRAFT_212836 PE=4 SV=1                                                                         | 0         | PREDICTED: ATP-binding cassette sub-family<br>A member 1-like [Aplysia californica]                                                                                                                                                                                                  | 0         |
| isogroup01857 | 984  | 69  | 27  | 1.07 | 0.000634201 | Zinc finger protein GIS2 OS=Saccharomyces<br>cerevisiae (strain ATCC 204508 / S288c)<br>GN=GIS2 PE=1 SV=1                                           | 3.00E-09  | Probable Zinc finger protein GIS2<br>OS=Zygosaccharomyces bailii ISA1307<br>GN=ZbGIS2 PE=4 SV=1                                                      | 4.00E-08  | hypothetical protein FPSE_03593 [Fusarium<br>pseudograminearum CS3096]                                                                                                                                                                                                               | 6.00E-07  |

|               |      |      |     |      |             |                                                                                                            |          |                                                                                                                       |           |                                                                                           |           |
|---------------|------|------|-----|------|-------------|------------------------------------------------------------------------------------------------------------|----------|-----------------------------------------------------------------------------------------------------------------------|-----------|-------------------------------------------------------------------------------------------|-----------|
| isogroup06033 | 1422 | 99   | 39  | 1.06 | 4.86E-05    | tRNA (guanine(37)-N1)-methyltransferase<br>OS=Plasmodium falciparum (isolate 3D7)<br>GN=PFI0700c PE=3 SV=1 | 1.8      | Transposable element Tc3 transposase<br>(Fragment) OS=Camponotus floridanus<br>GN=EAG_14192 PE=4 SV=1                 | 9.00E-21  | Transposable element Tc3 transposase<br>[Camponotus floridanus]                           | 6.00E-21  |
| isogroup05272 | 2235 | 241  | 95  | 1.06 | 2.39E-10    | E3 ubiquitin-protein ligase XIAP OS=Xenopus<br>tropicalis GN=xiap PE=2 SV=1                                | 5.00E-22 | E3 ubiquitin-protein ligase XIAP OS=Xenopus<br>tropicalis GN=xiap PE=4 SV=1                                           | 1.00E-20  | PREDICTED: E3 ubiquitin-protein ligase XIAP<br>[Alligator sinensis]                       | 2.00E-23  |
| contig13518   | 1536 | 224  | 89  | 1.05 | 1.42E-09    | Spore coat protein SP60 OS=Dictyostelium<br>discoideum GN=cotC PE=1 SV=2                                   | 0.18     | Collagen alpha-1(VII) chain (Fragment)<br>OS=Clonorchis sinensis GN=CLF_109355<br>PE=4 SV=1                           | 9.00E-12  | collagen alpha-1(VII) chain, partial [Clonorchis<br>sinensis]                             | 6.00E-12  |
| contig13459   | 4751 | 1054 | 421 | 1.04 | 0           | Ribosomal operon-associated A protein<br>OS=Euglena gracilis GN=roaA PE=3 SV=1                             | 0.065    | Putative von Willebrand factor type A domain-<br>containing protein OS=Schistosoma mansoni<br>GN=Smp_157690 PE=4 SV=1 | 2.00E-29  | putative von Willebrand factor type A domain-<br>containing protein [Schistosoma mansoni] | 1.00E-29  |
| contig16712   | 1378 | 75   | 30  | 1.04 | 0.000509013 | Retrovirus-related Pol polyprotein from<br>transposon 412 OS=Drosophila melanogaster<br>GN=POL PE=4 SV=1   | 6.00E-09 | Putative uncharacterized protein (Fragment)<br>OS=Caenorhabditis brenneri<br>GN=CAEBREN_20879 PE=4 SV=1               | 4.00E-12  | hypothetical protein CAEBREN_20879<br>[Caenorhabditis brenneri]                           | 3.00E-12  |
| isogroup10940 | 1924 | 75   | 30  | 1.04 | 0.000509013 | DNA polymerase OS=Zea mays PE=3 SV=1                                                                       | 5.00E-08 | Putative uncharacterized protein OS=Tribolium<br>castaneum GN=TcasGA2_TC006914 PE=4<br>SV=1                           | 1.00E-116 | hypothetical protein TcasGA2_TC006914<br>[Tribolium castaneum]                            | 1.00E-116 |
| isogroup01463 | 1426 | 756  | 303 | 1.04 | 0           | Uncharacterized protein C2orf16 OS=Homo<br>sapiens GN=C2orf16 PE=2 SV=3                                    | 0.002    | Putative uncharacterized protein (Fragment)<br>OS=Camponotus floridanus GN=EAG_11248<br>PE=4 SV=1                     | 6.00E-15  | hypothetical protein EAG_11248 [Camponotus<br>floridanus]                                 | 4.00E-15  |
| isogroup23048 | 629  | 147  | 59  | 1.03 | 1.25E-06    | Retrovirus-related Pol polyprotein from<br>transposon 412 OS=Drosophila melanogaster<br>GN=POL PE=4 SV=1   | 0.005    | Uncharacterized protein (Fragment)<br>OS=Nasonia vitripennis PE=4 SV=1                                                | 2.00E-06  | PREDICTED: uncharacterized protein<br>LOC101159144 [Oryzias latipes]                      | 5.00E-05  |
| contig13547   | 1882 | 1444 | 580 | 1.03 | 0           | Protease inhibitors OS=Locusta migratoria<br>PE=1 SV=2                                                     | 0.22     | Collagen alpha 1VII chain OS=Echinococcus<br>granulosus GN=EgrG_000619300 PE=4 SV=1                                   | 8.00E-09  | collagen alpha 1VII chain [Echinococcus<br>granulosus]                                    | 6.00E-09  |
| isogroup21891 | 687  | 102  | 41  | 1.03 | 5.55E-05    | Retrovirus-related Pol polyprotein from<br>transposon 412 OS=Drosophila melanogaster<br>GN=POL PE=4 SV=1   | 0.044    | Uncharacterized protein OS=Strongylocentrotus<br>purpuratus GN=Sp-Pppl_177 PE=4 SV=1                                  | 1.00E-07  | Gap-Pol polyprotein [Schistosoma japonicum]                                               | 2.00E-06  |
| isogroup10208 | 2318 | 77   | 31  | 1.03 | 0.000472058 | Zinc finger CCHC domain-containing protein 13<br>OS=Homo sapiens GN=ZCCHC13 PE=2 SV=1                      | 5.00E-05 | Putative transposase OS=Anopheles gambiae<br>PE=4 SV=1                                                                | 2.00E-55  | putative transposase [Anopheles gambiae]                                                  | 2.00E-55  |
| isogroup14127 | 1291 | 77   | 31  | 1.03 | 0.000472058 | Protein phosphatase Slingshot homolog 3<br>OS=Mus musculus GN=Ssh3 PE=1 SV=1                               | 2        | Paired box protein and Transposase domain<br>containing protein OS=Haemonchus contortus<br>GN=HCOI_00676400 PE=3 SV=1 | 2.00E-07  | PREDICTED: uncharacterized protein<br>LOC101237877 [Hydra magnipapillata]                 | 2.00E-07  |
| isogroup00839 | 1167 | 896  | 361 | 1.03 | 0           | Zinc finger CCCH domain-containing protein 13<br>OS=Homo sapiens GN=ZC3H13 PE=1 SV=1                       | 3.00E-09 | LWamide neuropeptides (Fragment)<br>OS=Harpegnathos saltator GN=EAL_16679<br>PE=4 SV=1                                | 8.00E-12  | hypothetical protein A306_08913, partial<br>[Columba livia]                               | 1.00E-15  |
| isogroup09329 | 3225 | 544  | 222 | 1.01 | 0           | Protein FAM115 OS=Xenopus laevis<br>GN=fam115 PE=2 SV=1                                                    | 1.00E-32 | Uncharacterized protein OS=Lottia gigantea<br>GN=LOTGIDRAFT_236481 PE=4 SV=1                                          | 2.00E-60  | hypothetical protein LOTGIDRAFT_236481<br>[Lottia gigantea]                               | 2.00E-60  |
| isogroup04582 | 1654 | 242  | 99  | 1.01 | 1.17E-09    | Transcription factor 7 OS=Homo sapiens<br>GN=TCF7 PE=1 SV=3                                                | 7.00E-35 | HMG protein TCF/LEF (Fragment) OS=Dugesia<br>japonica GN=03133HH PE=2 SV=1                                            | 1.00E-126 | HMG protein TCF/LEF [Dugesia japonica]                                                    | 1.00E-126 |
| isogroup16797 | 1030 | 78   | 32  | 1.00 | 0.000576628 | Retrovirus-related Pol polyprotein from<br>transposon 412 OS=Drosophila melanogaster<br>GN=POL PE=4 SV=1   | 2.00E-17 | Putative uncharacterized protein OS=Tribolium<br>castaneum GN=TcasGA2_TC001491 PE=4<br>SV=1                           | 8.00E-24  | hypothetical protein TcasGA2_TC001491<br>[Tribolium castaneum]                            | 6.00E-24  |
