# Supplementary material for: Unusually Large Number of Mutations in Asexually Reproducing Clonal Planarian Dugesia japonica
Source: PubMed Central journal article supplement (PMC4654569; doi:10.1371/journal.pone.0143525), 2015-11-20
Supplement: pone.0143525.s009.pdf [file pone.0143525.s009.pdf]

| Codon table           |       | Random SNP simulation    |                              | <i>D. japonica</i> codon usage          |                                         | <i>D. japonica</i> SNP simulation |                                     |
|-----------------------|-------|--------------------------|------------------------------|-----------------------------------------|-----------------------------------------|-----------------------------------|-------------------------------------|
| Amino-acid (1 letter) | Codon | Count of synonymous SNPs | Count of non-synonymous SNPs | Codon frequency for each amino acid (%) | Codon frequency for all amino acids (%) | Fraction of synonymous SNPs (%)   | Fraction of non-synonymous SNPs (%) |
| Ala (A)               | GCA   | 3                        | 6                            | 38.1                                    | 1.45                                    | 0.48                              | 0.97                                |
|                       | GCC   | 3                        | 6                            | 12.1                                    | 0.46                                    | 0.15                              | 0.31                                |
|                       | GCG   | 3                        | 6                            | 9.4                                     | 0.36                                    | 0.12                              | 0.24                                |
|                       | GCT   | 3                        | 6                            | 40.3                                    | 1.54                                    | 0.51                              | 1.03                                |
| Cys (C)               | TGC   | 1                        | 8                            | 26.3                                    | 0.60                                    | 0.07                              | 0.54                                |
|                       | TGT   | 1                        | 8                            | 73.7                                    | 1.69                                    | 0.19                              | 1.50                                |
| Asp (D)               | GAC   | 1                        | 8                            | 18.6                                    | 0.99                                    | 0.11                              | 0.88                                |
|                       | GAT   | 1                        | 8                            | 81.4                                    | 4.35                                    | 0.48                              | 3.86                                |
| Glu (E)               | GAA   | 1                        | 8                            | 83.1                                    | 5.37                                    | 0.60                              | 4.77                                |
|                       | GAG   | 1                        | 8                            | 16.9                                    | 1.09                                    | 0.12                              | 0.97                                |
| Phe (F)               | TTC   | 1                        | 8                            | 28.3                                    | 1.38                                    | 0.15                              | 1.23                                |
|                       | TTT   | 1                        | 8                            | 71.7                                    | 3.50                                    | 0.39                              | 3.11                                |
| Gly (G)               | GGA   | 3                        | 6                            | 46.6                                    | 1.91                                    | 0.64                              | 1.27                                |
|                       | GGC   | 3                        | 6                            | 10.3                                    | 0.42                                    | 0.14                              | 0.28                                |
|                       | GGG   | 3                        | 6                            | 8.1                                     | 0.33                                    | 0.11                              | 0.22                                |
|                       | GGT   | 3                        | 6                            | 35.0                                    | 1.43                                    | 0.48                              | 0.95                                |
| His (H)               | CAC   | 1                        | 8                            | 24.3                                    | 0.54                                    | 0.06                              | 0.48                                |
|                       | CAT   | 1                        | 8                            | 75.7                                    | 1.67                                    | 0.19                              | 1.48                                |
| Ile (I)               | ATA   | 2                        | 7                            | 29.9                                    | 2.58                                    | 0.57                              | 2.00                                |
|                       | ATC   | 2                        | 7                            | 16.5                                    | 1.42                                    | 0.32                              | 1.11                                |
|                       | ATT   | 2                        | 7                            | 53.5                                    | 4.61                                    | 1.02                              | 3.58                                |
| Lys (K)               | AAA   | 1                        | 8                            | 82.0                                    | 6.57                                    | 0.73                              | 5.84                                |
|                       | AAG   | 1                        | 8                            | 18.0                                    | 1.44                                    | 0.16                              | 1.28                                |
| Leu (L)               | CTA   | 4                        | 5                            | 9.1                                     | 0.85                                    | 0.38                              | 0.47                                |
|                       | CTC   | 3                        | 6                            | 6.4                                     | 0.60                                    | 0.20                              | 0.40                                |
|                       | CTG   | 4                        | 5                            | 6.3                                     | 0.59                                    | 0.26                              | 0.33                                |
|                       | CTT   | 3                        | 6                            | 15.7                                    | 1.46                                    | 0.49                              | 0.97                                |
|                       | TTA   | 2                        | 7                            | 38.5                                    | 3.58                                    | 0.80                              | 2.78                                |
|                       | TTG   | 2                        | 7                            | 24.0                                    | 2.24                                    | 0.50                              | 1.74                                |
| Met (M)               | ATG   | 0                        | 9                            | 100.0                                   | 2.20                                    | 0.00                              | 2.20                                |
| Asn (N)               | AAC   | 1                        | 8                            | 19.4                                    | 1.47                                    | 0.16                              | 1.30                                |
|                       | AAT   | 1                        | 8                            | 80.6                                    | 6.08                                    | 0.68                              | 5.40                                |
| Pro (P)               | CCA   | 3                        | 6                            | 47.1                                    | 1.71                                    | 0.57                              | 1.14                                |
|                       | CCC   | 3                        | 6                            | 8.1                                     | 0.29                                    | 0.10                              | 0.20                                |
|                       | CCG   | 3                        | 6                            | 14.5                                    | 0.53                                    | 0.18                              | 0.35                                |
|                       | CCT   | 3                        | 6                            | 30.3                                    | 1.10                                    | 0.37                              | 0.73                                |
| Gln (Q)               | CAA   | 1                        | 8                            | 77.6                                    | 3.01                                    | 0.33                              | 2.68                                |
|                       | CAG   | 1                        | 8                            | 22.4                                    | 0.87                                    | 0.10                              | 0.77                                |
| Arg (R)               | AGA   | 2                        | 7                            | 43.8                                    | 1.84                                    | 0.41                              | 1.43                                |
|                       | AGG   | 2                        | 7                            | 7.6                                     | 0.32                                    | 0.07                              | 0.25                                |
|                       | CGA   | 4                        | 5                            | 23.3                                    | 0.98                                    | 0.43                              | 0.54                                |
|                       | CGC   | 3                        | 6                            | 5.1                                     | 0.21                                    | 0.07                              | 0.14                                |
|                       | CGG   | 4                        | 5                            | 5.3                                     | 0.22                                    | 0.10                              | 0.12                                |
|                       | CGT   | 3                        | 6                            | 15.0                                    | 0.63                                    | 0.21                              | 0.42                                |
| Ser (S)               | AGC   | 1                        | 8                            | 6.6                                     | 0.56                                    | 0.06                              | 0.50                                |
|                       | AGT   | 1                        | 8                            | 21.7                                    | 1.85                                    | 0.21                              | 1.64                                |
|                       | TCA   | 3                        | 6                            | 29.5                                    | 2.52                                    | 0.84                              | 1.68                                |
|                       | TCC   | 3                        | 6                            | 7.9                                     | 0.68                                    | 0.23                              | 0.45                                |
|                       | TCG   | 3                        | 6                            | 9.2                                     | 0.79                                    | 0.26                              | 0.52                                |
|                       | TCT   | 3                        | 6                            | 25.0                                    | 2.13                                    | 0.71                              | 1.42                                |
| Thr (T)               | ACA   | 3                        | 6                            | 42.0                                    | 2.12                                    | 0.71                              | 1.41                                |
|                       | ACC   | 3                        | 6                            | 11.9                                    | 0.60                                    | 0.20                              | 0.40                                |
|                       | ACG   | 3                        | 6                            | 10.1                                    | 0.51                                    | 0.17                              | 0.34                                |
|                       | ACT   | 3                        | 6                            | 36.1                                    | 1.82                                    | 0.61                              | 1.22                                |
| Val (V)               | GTA   | 3                        | 6                            | 25.3                                    | 1.29                                    | 0.43                              | 0.86                                |
|                       | GTC   | 3                        | 6                            | 11.8                                    | 0.60                                    | 0.20                              | 0.40                                |
|                       | GTG   | 3                        | 6                            | 16.1                                    | 0.82                                    | 0.27                              | 0.55                                |
|                       | GTT   | 3                        | 6                            | 46.8                                    | 2.39                                    | 0.80                              | 1.59                                |
| Trp (W)               | TGG   | 0                        | 9                            | 100.0                                   | 1.01                                    | 0.00                              | 1.01                                |
| Tyr (Y)               | TAC   | 1                        | 8                            | 22.2                                    | 0.81                                    | 0.09                              | 0.72                                |
|                       | TAT   | 1                        | 8                            | 77.8                                    | 2.85                                    | 0.32                              | 2.54                                |
| Stop (*)              | TAA   | 2                        | 7                            | 52.0                                    | 0.10                                    | 0.02                              | 0.08                                |
|                       | TAG   | 1                        | 8                            | 15.0                                    | 0.03                                    | 0.00                              | 0.03                                |
|                       | TGA   | 1                        | 8                            | 33.1                                    | 0.07                                    | 0.01                              | 0.06                                |
| Total frequency       |       | 24.0%                    | 76.0%                        |                                         |                                         | 20.3%                             | 79.7%                               |
