# Supplementary material for: Unusually Large Number of Mutations in Asexually Reproducing Clonal Planarian Dugesia japonica
Source: PubMed Central journal article supplement (PMC4654569; doi:10.1371/journal.pone.0143525), 2015-11-20
Supplement: pone.0143525.s010.pdf [file pone.0143525.s010.pdf]

| <b>Codon position</b> | <b># of SNPs</b> |       | <b># of heterozygous SNPs</b> |       | <b># of filtered heterozygous SNPs</b> |       |
|-----------------------|------------------|-------|-------------------------------|-------|----------------------------------------|-------|
| 1st                   | 84,756           | 25.7% | 82,077                        | 25.5% | 51,691                                 | 25.5% |
| 2nd                   | 69,000           | 20.9% | 66,562                        | 20.7% | 41,796                                 | 20.6% |
| 3rd                   | 176,623          | 53.5% | 173,073                       | 53.8% | 108,947                                | 53.8% |
