# Supplementary material for: Unusually Large Number of Mutations in Asexually Reproducing Clonal Planarian Dugesia japonica
Source: PubMed Central journal article supplement (PMC4654569; doi:10.1371/journal.pone.0143525), 2015-11-20
Supplement: pone.0143525.s011.pdf [file pone.0143525.s011.pdf]

| <b>Isogroup</b> | <b>Forward primer</b>          | <b>Reverse primer</b>         |
|-----------------|--------------------------------|-------------------------------|
| isogroup09578   | GTTCTCTATCGGTTTCTGAGGAGTATTTAG | GGAGAAATATTGCATGAATTTGCC      |
| isogroup09721   | TGACCACAATGGAGCGACTTT          | GTGGGACTGGTTTAGCGTTTGTA       |
| isogroup09800   | GGAGCTCGTCCGGATCTAGAA          | CGAGCTGACTGTACTTGTCGGAA       |
| isogroup10556   | TCCAATTGTTCTGGGACCTCC          | AATTGTTTTACACAATCAACGAAATCG   |
| isogroup18798   | GCTTAACACCGACTCAAGTAGGGA       | TTTTGCAGCAGCAGCTCTGTC         |
| isogroup14546   | CATTGCAGCGATACCTGACATG         | TGAATTTGTCCGGAATCGGTC         |
| isogroup17454   | TTGCTCTCTTTACGCTCCGGT          | CATAGTTCCTGCATGGTGGAA         |
| isogroup13916   | TATCGGTGATGGATGATTGCC          | CACCTTCGACGAATCATAGCG         |
| isogroup09861   | GTATGGATTAGCATTATTGAATTGTGCTC  | AAACTCCACCGCAGTACTTCAAC       |
| isogroup14819   | GAGTCGTAAGGCTTCTCTCCAACA       | CTGAAATCGAATACTGCAACCTGA      |
| isogroup21204   | GATTTATTTGATCGCCAATGCTG        | CAAAGTGATGCCACTTCTCATC        |
| isogroup10589   | TGCTTCGGTGTTATATTTTACTGTTGG    | ACACAAAACGTCTTGGAGCATTCT      |
| isogroup19020   | CGGTGAAATAGCTAATGCAGCA         | TTGAAACCAAACAAAAAATGGGA       |
| isogroup05208   | TTTGGCATTCTTGTCGATTGTA         | GCGAGCAGATGCGAAGATTT          |
| contig13483     | CCAAGCTGAATTTTTCTTACGGC        | AAGGATGTCAATGTGTCAAACAAATATTT |
| contig13535     | CCCATCTCGAATGAATCCTTTATTG      | CTCGGCGTCCGTGTTATGAT          |
| contig14746     | GAGTCGTAAGGCTTCTCTCCAACA       | CTGAAATCGAATACTGCAACCTGA      |
